# Supplementary material for: Characterization of Signalling Pathways That Link Apoptosis and Autophagy to Cell Death Induced by Estrone Analogues Which Reversibly Depolymerize Microtubules
Source: MDPI journal article supplement (doi:10.3390/molecules26030706), 2021-01-29
Supplement: s1 [file s1]

## Mercier *et al.* Supplementary methods and data Sept 2020

### 1. Supplementary methods

#### S1. Signal transduction: Reverse phase protein array platform

**Table S1.** Antibodies used in RPPA analysis. Sp = species in which antibody was raised (R=rabbit, M=mouse); suppliers: CST= Cell Signaling Technology Corp.; Upstate (Merck Millipore Corp.); BD = BD Biosciences; Sigma = Sigma-Aldrich; Ref = reference catalogue number.

| Name                                                                                             | Sp | Supplier            | Ref                                                   | Dilution | Pathways                                      |
|--------------------------------------------------------------------------------------------------|----|---------------------|-------------------------------------------------------|----------|-----------------------------------------------|
| <b>Autophagy/apoptosis</b>                                                                       |    |                     |                                                       |          |                                               |
| Tumour necrosis factor (TNF)-related apoptosis-inducing ligand (TRAIL)                           | R  | CST                 | ' <a href="#">3219</a><br>( <a href="#">C92B9</a> )'  | 1/1000   | Apoptosis                                     |
| p53 upregulated modulator of apoptosis (PUMA) (C-Terminal)                                       | R  | Epitomics           | ' <a href="#">1652-1</a> '                            | 1/5000   | Autophagy, Apoptosis                          |
| Beclin-1                                                                                         | R  | CST                 | ' <a href="#">3738</a> '                              | 1/500    | Autophagy, Apoptosis                          |
| Phospho-p21-activating kinase 1 (PAK1) (serine (Ser) 144)                                        | R  | Epitomics           | ' <a href="#">1705-1</a> '                            | 1/5000   | Cytoskeleton, Cell cycle, Apoptosis           |
| <b>DNA repair/ checkpoint control/ cell cycle</b>                                                |    |                     |                                                       |          |                                               |
| Phospho-p53 (Ser 15)                                                                             | R  | CST                 | ' <a href="#">9284</a> '                              | 1/1000   | DNA repair, Checkpoint, Cell cycle, Apoptosis |
| Phospho-retinoblastoma (pRb) (Ser 807/811)                                                       | R  | CST                 | ' <a href="#">9308</a> '                              | 1/1000   | Checkpoint, Cell cycle                        |
| Cyclin-dependent kinase 4 inhibitor B (p15 <sup>INK4B</sup> )                                    | R  | CST                 | ' <a href="#">4822</a> '                              | 1/500    | Cell cycle                                    |
| Phospho-cyclin-dependent kinase (Cdk) inhibitor p27 (p27 <sup>Kip1</sup> ) (threonine (Thr) 198) | R  | Abcam               | ' <a href="#">ab64949</a> '                           | 1/1000   | Checkpoint, Cell cycle                        |
| <b>Phosphoinositide 3-kinase (PI3K) pathway</b>                                                  |    |                     |                                                       |          |                                               |
| Protein kinase B (PKB)/Akt                                                                       | R  | CST                 | ' <a href="#">9272</a> '                              | 1/1000   | PI3K pathway                                  |
| Phospho-phosphatase and tensin homolog (PTEN) (Ser380/Thr382/383)                                | R  | CST                 | ' <a href="#">9554</a> '                              | 1/1000   | PI3K pathway                                  |
| Phospho-Akt Substrate (RXRXX Ser/Thr)                                                            | R  | CST                 | ' <a href="#">9614</a><br>( <a href="#">110B7e</a> )' | 1/20000  | PI3K pathway                                  |
| Phospho-mammalian target of rapamycin (mTOR) (Ser2448)                                           | R  | Abcam               | ' <a href="#">ab109268</a> '                          | 1/1000   | PI3K pathway                                  |
| Phospho-p70 S6 kinase (Thr421/Ser424)                                                            | R  | Upstate (Millipore) | ' <a href="#">04-393</a> '                            | 1/1000   | PI3K pathway                                  |
| Phospho-Akt (Ser473) (193H12)                                                                    | R  | CST                 | ' <a href="#">4058</a> '                              | 1/250    | PI3K pathway                                  |
| PI3 Kinase p110 subunit Beta                                                                     | R  | CST                 | ' <a href="#">3011</a> '                              | 1/1000   | PI3K pathway                                  |
| Forkhead box protein O1 (FOXO1) (C29H4)                                                          | R  | CST                 | ' <a href="#">2880</a> '                              | 1/1000   | PI3K pathway                                  |
| <b>Wnt/Notch pathway</b>                                                                         |    |                     |                                                       |          |                                               |
| Segment polarity protein dishevelled homolog 3 (Dvl3)                                            | R  | CST                 | ' <a href="#">3218</a> '                              | 1/1000   | Wnt/Notch pathway                             |
| Beta catenin (6B3)                                                                               | R  | CST                 | ' <a href="#">9582</a> '                              | 1/2000   | Wnt/Notch pathway                             |
| <b>Ca/cAMP signalling</b>                                                                        |    |                     |                                                       |          |                                               |
| Protein kinase A (PKA)-catalytic subunit alpha                                                   | R  | Epitomics           | ' <a href="#">2113-1</a> '                            | 1/3000   | Ca/cAMP signalling                            |

| AMPK pathway                                                                          |   |           |                          |        |                      |
|---------------------------------------------------------------------------------------|---|-----------|--------------------------|--------|----------------------|
| Phospho-adenosine monophosphate (AMP)-activated protein kinase (AMPK) beta1 (Ser181)  | R | Epitomics | <a href="#">'2271-1'</a> | 1/1000 | AMPK pathway         |
| Janus kinase (JAK)/signal transducer and activator of transcription (STAT) signalling |   |           |                          |        |                      |
| Phospho- STAT3 (Ser727)                                                               | R | CST       | <a href="#">'9134'</a>   | 1/1000 | JAK/ STAT signalling |
| NFκB signalling                                                                       |   |           |                          |        |                      |
| Phospho-NF-κB p65 (Ser536)                                                            | R | CST       | <a href="#">'3033'</a>   | 1/1000 | NFκB signalling      |
| Transforming growth factor (TGF)- β signalling                                        |   |           |                          |        |                      |
| Phospho- mothers against decapentaplegic homolog 3 (Smad3) (Ser423/425)               | R | Epitomics | <a href="#">'1880-1'</a> | 1/1000 | TGF- β signalling    |

## 2. Supplementary results

### S2.1. Cell cycle analysis

Flow cytometric analysis was done on the ESE-15-one and ESE-16-exposed HeLa- and MDA-MB-231 cells for 2- and 24-hours. A minimum of 10 000 cells were analysed per sample and the data plotted as FL3 Lin (X-axis) against number of cells (Y-axis) using Kaluza 1.3 software (Beckman Coulter, Ca, USA) (representative histograms displayed in figure 26.A). Data accumulated from a minimum of three biological repeats was done using the (ANOVA-single factor model and a two-tailed Student's *t*-test (statistics shown in table S2).

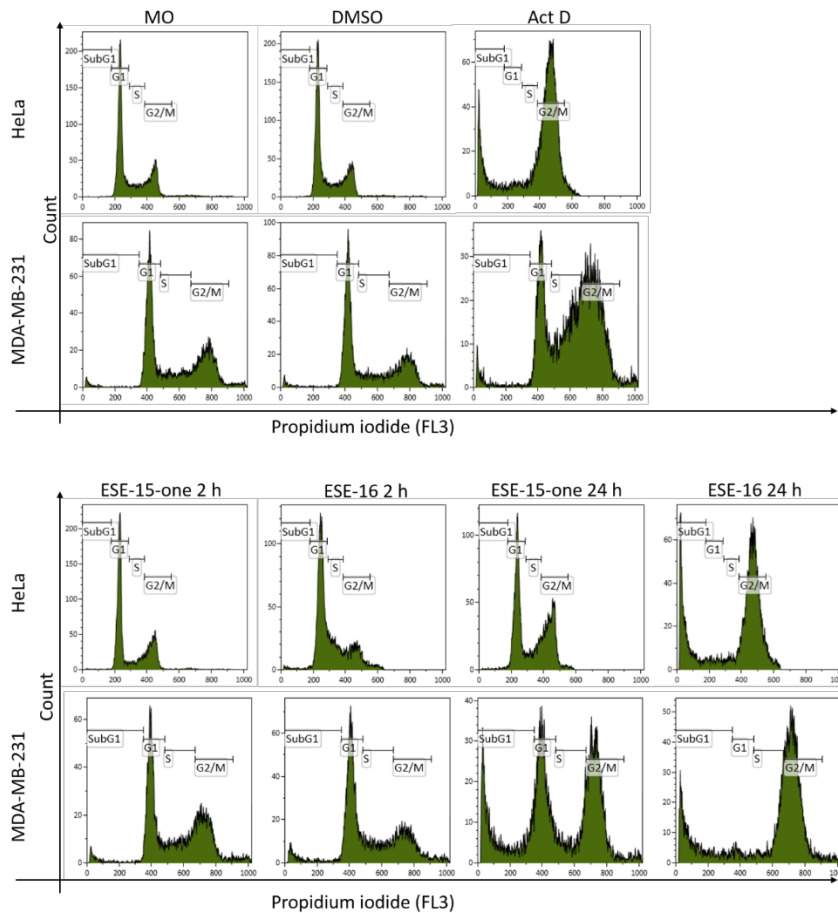

**Figure S1.** Representative cell cycle histograms of HeLa and MDA-MB-231 cells exposed to the compounds and controls for 2- and 24-hours. Cells propagated in medium only (MO) and exposure to the DMSO vehicle served as negative controls and did not differ in their distributions. Actinomycin D (Act D) was a positive apoptosis control. No significant changes were detected in the cell cycle distribution after a 2-hour exposure to ESE-15-one and ESE-16. At 24 hours, a significant decrease in cells in G1 was detected, together with an increase in G2/M and sub-G1 indicating a metaphase block and apoptosis respectively.

**Table S2.** Cell cycle analysis of HeLa and MDA-MB-231 cells. Statistical data were generated using Kaluza 1.3 software (Beckman Coulter, Ca, USA) and analysed using the ANOVA-single factor model and a two-tailed Student's t-test. Displayed are the average percentages of cells (three biological repeats) in each phase of the cell cycle, the standard deviation (Std dev) and the P value calculated to determine statistical significance when compared to the DMSO vehicle control. (MO = cells propagated in growth-medium only; Act D = actinomycin D)

| Agent of exposure           | MO      | DMSO     | Act D | ESE-15-one 2 h | ESE-16 2 h | ESE-15-one 24 h | ESE-16 24 h |
|-----------------------------|---------|----------|-------|----------------|------------|-----------------|-------------|
| <b>HeLa cell line</b>       |         |          |       |                |            |                 |             |
| Sub-G <sub>1</sub>          | Average | 0.33     | 1.19  | 18.32          | 5.42       | 5.66            | 18.99       |
|                             | Std dev | 0.15     | 1.15  | 4.53           | 0.82       | 1.90            | 1.70        |
|                             | P value | 3.16E-01 |       | 4.97E-03       | 1.38E-01   | 1.52E-01        | 3.05E-03    |
| G <sub>1</sub>              | Average | 58.34    | 62.14 | 42.50          | 61.57      | 63.02           | 40.43       |
|                             | Std dev | 3.43     | 3.82  | 3.54           | 5.05       | 8.51            | 3.32        |
|                             | P value | 1.90E-01 |       | 3.79E-03       | 8.83E-01   | 8.59E-01        | 5.45E-04    |
| S                           | Average | 13.45    | 13.21 | 10.10          | 9.89       | 12.56           | 14.43       |
|                             | Std dev | 1.89     | 2.52  | 1.85           | 1.25       | 2.04            | 2.67        |
|                             | P value | 8.81E-01 |       | 1.34E-01       | 1.66E-01   | 7.72E-01        | 5.30E-01    |
| G <sub>2</sub> /M           | Average | 23.44    | 20.16 | 29.00          | 21.17      | 17.31           | 35.72       |
|                             | Std dev | 4.33     | 4.07  | 1.41           | 2.59       | 2.40            | 6.46        |
|                             | P value | 3.13E-01 |       | 4.69E-02       | 7.72E-01   | 4.26E-01        | 6.54E-03    |
| <b>MDA-MB-231 cell line</b> |         |          |       |                |            |                 |             |
| Sub-G <sub>1</sub>          | Average | 2.93     | 3.60  | 13.88          | 3.65       | 7.23            | 28.52       |
|                             | Std dev | 1.62     | 2.46  | 0.62           | 0.12       | 0.95            | 5.55        |
|                             | P value | 7.12E-01 |       | 2.16E-03       | 9.83E-01   | 1.53E-01        | 5.48E-03    |
| G <sub>1</sub>              | Average | 48.86    | 51.50 | 26.16          | 47.82      | 52.07           | 26.21       |
|                             | Stddev  | 1.91     | 0.92  | 0.62           | 3.34       | 2.62            | 3.09        |
|                             | P value | 9.71E-02 |       | 5.93E-05       | 1.46E-01   | 7.40E-01        | 7.39E-04    |
| S                           | Average | 14.19    | 14.14 | 22.94          | 16.43      | 14.51           | 8.05        |
|                             | Stddev  | 0.81     | 0.98  | 2.16           | 2.57       | 1.91            | 0.64        |
|                             | P value | 9.49E-01 |       | 3.01E-03       | 2.34E-01   | 7.78E-01        | 8.37E-04    |
| G <sub>2</sub> /M           | Average | 33.79    | 30.60 | 36.80          | 29.36      | 27.91           | 41.67       |
|                             | Stddev  | 2.12     | 2.65  | 1.51           | 3.95       | 1.64            | 5.27        |
|                             | P value | 1.80E-01 |       | 2.46E-02       | 6.74E-01   | 2.09E-01        | 3.15E-02    |

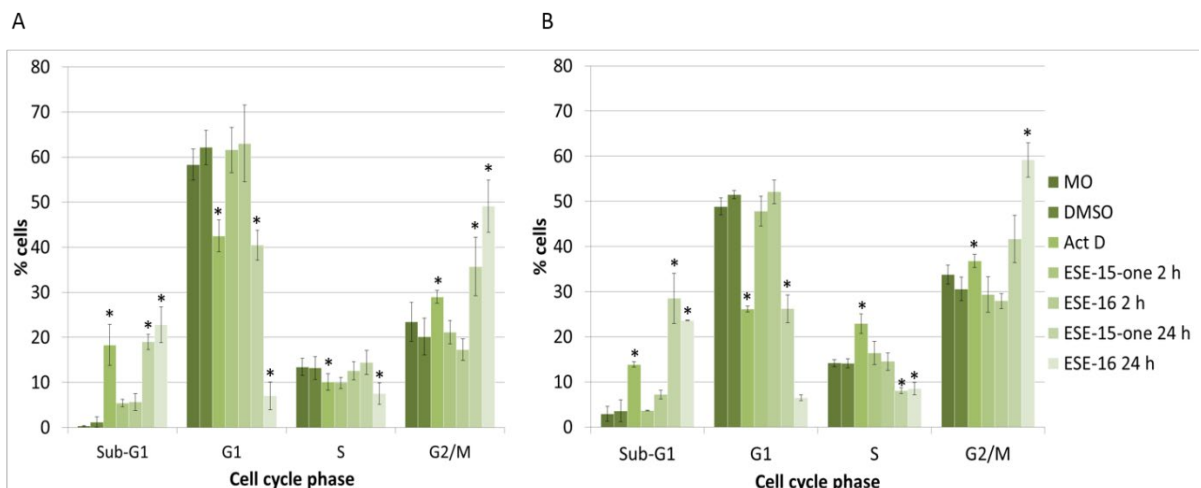

**Figure S2.** Bar graphs representing the stages of the cell cycle after a 2- and 24-hour exposure of HeLa and MDA-MB-231 cells to ESE-15-one and ESE-16. A. HeLa- and B. MDA-MB-231 cell cycle analysis. Actinomycin D (Act D) served as a positive apoptosis control. No statistical changes were evident in the cell cycle distributions after a 2-hour drug-exposure in both cell lines. A 24-hour drug-exposure resulted in a significant decrease in cells in G<sub>1</sub> with a concomitant increase in G<sub>2</sub>/M and sub-G<sub>1</sub> for both compounds and cell lines. Bars represent the mean % cells for 3 biological repeats, standard deviation indicated by error bars, and \**p* < 0.05 as compared to the DMSO-exposed samples. (MO = cells propagated in medium only)

## S2.2. Apoptosis induction: Annexin V quantification by flow cytometry

In order to detect induction of apoptosis in HeLa and MDA-MB-231 cells exposed to ESE-15-one and ESE-16 for 2- and 24-hours, flow cytometric detection of Annexin V was done (representative dot-plots shown in Figure S4). A 2-hour exposure to both drugs neither had a statistically significant effect on viability nor apoptosis induction in both cell lines. A 24-hour exposure to the analogues resulted in statistically significant decreased cell viability with a concurrent increase in apoptosis induction in both cell lines (statistics summarised in table S3; bar graph in figure S5). HeLa cells exposed to ESE-15-one and ESE-16 resulted in a drop in viability to  $64.0 \pm 8.6\%$  and  $52.0 \pm 0.4\%$  respectively. The same drug-exposure resulted in a drop in viability to  $52.4 \pm 7.9\%$  and  $53.8 \pm 2.9\%$  in MDA-MB-231 cells. Apoptosis induction increased to  $32.5 \pm 5.8\%$  and  $42.8 \pm 4.4\%$  after ESE-15-one exposure in HeLa and MDA-MB-231 cells respectively. ESE-16 exposure increased apoptosis induction to  $31.2 \pm 4.4\%$  and  $43.3 \pm 5.8\%$  in HeLa and MDA-MB-231 cells. None of the treatment conditions demonstrated a significant change in necrosis.

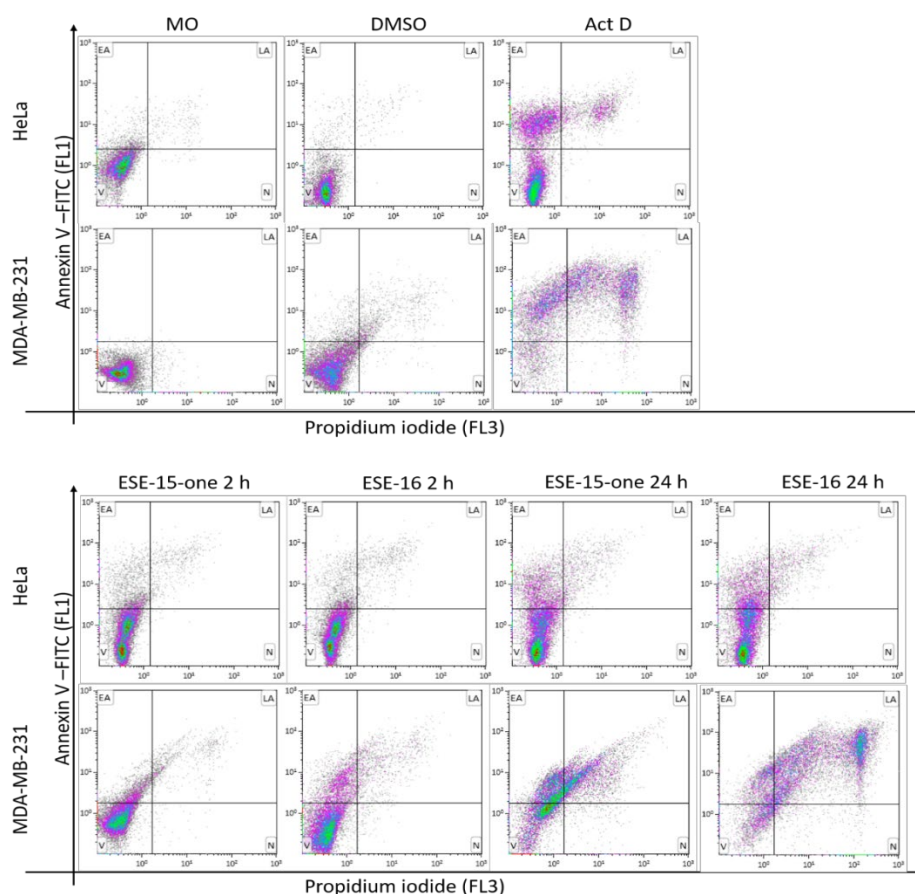

**Figure S3.** Representative flow cytometric dot-plots of Annexin V-FITC in HeLa and MDA-MB-231 cells exposed to the compounds for 2- and 24-hours. Cells propagated in medium only (MO) and exposed to DMSO served as negative controls. Actinomycin D (Act D) was a positive apoptosis control. (V = viable cells; EA = early apoptosis; LA = late apoptosis; N = necrosis)

**Table S3.** Annexin-V analysis of drug-exposed HeLa and MDA-MB-231 cells. Data were generated using Kaluza 1.3 software (Beckman Coulter) and analysed using the ANOVA-single factor model and a two-tailed Student's t-test. Displayed are the average percentages of cells (three biological repeats) which are viable, undergoing apoptosis or necrotic. (MO = cells propagated in growth-medium only; Act D = actinomycin D)

| Agent of exposure |         | MO    | DMSO     | Act D    | ESE-15-one 2 h | ESE-16 2 h | ESE-15-one 24 h | ESE-16 24 h |
|-------------------|---------|-------|----------|----------|----------------|------------|-----------------|-------------|
| <b>HeLa</b>       |         |       |          |          |                |            |                 |             |
| % cells           |         |       |          |          |                |            |                 |             |
| Viable            | Mean    | 84.39 | 87.10    | 64.01    | 90.52          | 86.95      | 64.03           | 52.03       |
|                   | Std dev | 0.21  | 4.67     | 4.24     | 3.56           | 6.35       | 8.59            | 0.38        |
|                   | P value |       | 6.91E-01 | 2.10E-02 | 1.35E-01       | 6.25E-01   | 9.42E-03        | 8.97E-05    |
| Apoptosis         | Mean    | 13.75 | 11.15    | 37.78    | 7.94           | 11.46      | 32.49           | 31.24       |
|                   | Std dev | 1.67  | 4.66     | 2.12     | 1.51           | 6.50       | 5.82            | 4.38        |
|                   | P value |       | 5.21E-01 | 6.25E-03 | 6.73E-02       | 6.73E-01   | 2.41E-02        | 3.41E-02    |
| Necrosis          | Mean    | 1.87  | 1.60     | 2.21     | 1.16           | 0.93       | 1.47            | 1.65        |
|                   | Std dev | 1.46  | 1.09     | 0.71     | 0.97           | 0.70       | 1.15            | 0.82        |
|                   | P value |       | 8.30E-01 | 7.92E-01 | 5.52E-01       | 3.89E-01   | 7.55E-01        | 7.15E-01    |
| <b>MDA-MB-231</b> |         |       |          |          |                |            |                 |             |
| Viable            | Mean    | 81.12 | 79.10    | 39.61    | 79.90          | 78.86      | 52.41           | 53.80       |
|                   | Std dev | 4.41  | 2.18     | 6.25     | 3.16           | 3.52       | 7.91            | 2.88        |
|                   | P value |       | 6.20E-01 | 4.11E-03 | 7.38E-01       | 5.66E-01   | 4.63E-02        | 1.81E-02    |
| Apoptosis         | Mean    | 11.35 | 18.76    | 53.47    | 19.55          | 26.18      | 42.79           | 43.26       |
|                   | Std dev | 5.07  | 4.91     | 10.73    | 3.36           | 1.61       | 4.38            | 5.81        |
|                   | P value |       | 2.76E-01 | 3.75E-02 | 1.11E-01       | 5.87E-02   | 2.19E-02        | 2.80E-02    |
| Necrosis          | Mean    | 1.26  | 1.65     | 1.85     | 0.55           | 1.10       | 0.70            | 2.28        |
|                   | Std dev | 0.84  | 0.93     | 1.10     | 0.25           | 0.72       | 0.18            | 1.20        |
|                   | P value |       | 8.03E-01 | 5.93E-01 | 4.33E-01       | 8.90E-01   | 6.30E-01        | 5.54E-01    |

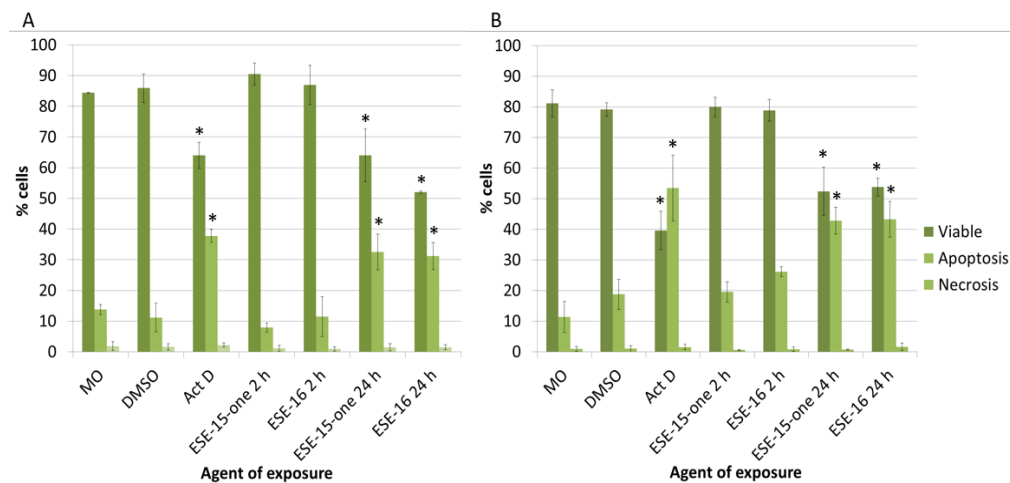

**Figure S4.** Bar graphs representing cell viability and apoptosis induction after a 2- and 24-hour exposure of HeLa (A) and MDA-MB-231 (B) cells to ESE-15-one and ESE-16. No statistical changes were evident in the cell viability after a 2-hour exposure in both cell lines. A 24-hour drug-exposure resulted in a significant decrease in viable cells with a concomitant increase in cells undergoing apoptosis from exposure to both compounds in HeLa and MDA-MB-231 cells. Bar charts represent the mean % cells for 3 biological repeats, SD indicated by error bars; \* $p < 0.05$ . (MO = cells propagated in medium only)

### S2.3. Autophagic vacuole quantification via autophagy-related light chain 3 (LC3B) protein quantification

Tamoxifen was used as a positive autophagy control. No differences were detected between the vehicle-exposed cells and cells exposed to growth medium only, nor cells exposed to the compounds for 2 h in both cell lines. ESE-15-one-exposure for 24 hours increased LC3B detection significantly by  $1.59 \pm 0.29$ -fold in HeLa cells and by  $2.61 \pm 0.46$ -fold in MDA-MB-231 cells. Similarly, ESE-16-exposure increased LC3B detection by  $1.63 \pm 0.15$ -fold in HeLa cells and  $2.16 \pm 0.43$ -fold in MDA-MB-231 cells after 24 hours.



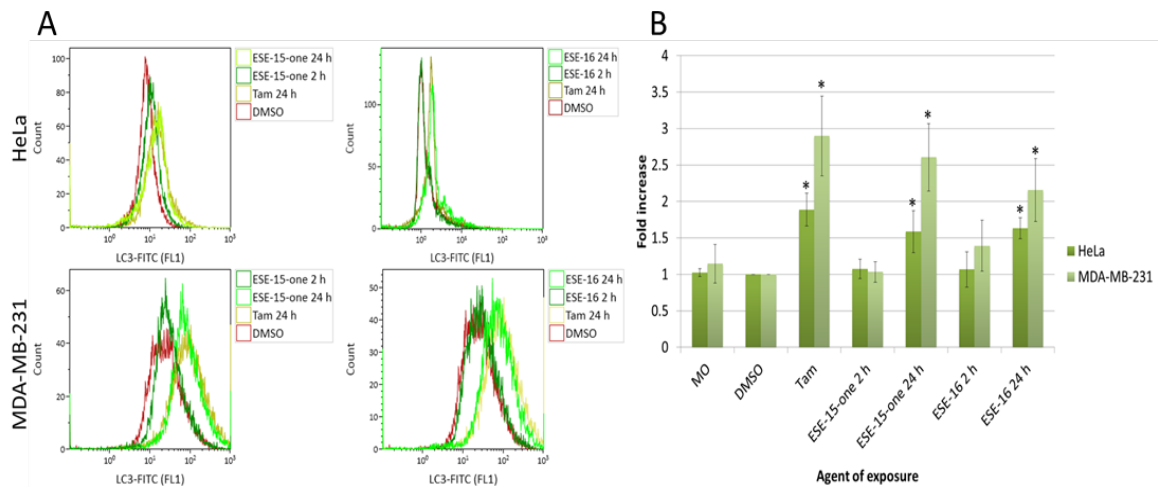

Figure S5. Overlay histograms (A) and bar chart (B) demonstrating the fold-increase in LC3-detection in HeLa and MDA-MB-231 cells exposed to the novel compounds. An increase in LC3B expression was observed at the 24-hour exposure. Bar charts represent the mean fold-increase over 3 biological repeats, standard deviation indicated by error bars, and  $*p < 0.05$ .

#### S2.4. Attenuation of autophagy decreases the cytotoxic effects of ESE-15-one and ESE-16 in MDA-MB-231 cells

In order to quantify the effect of autophagy inhibition on the cytotoxicity of ESE-15-one and ESE-16, flow cytometric quantification of Annexin V was done. MDA-MB-231 cells were exposed to ESE-15-one and ESE-16 for 2- and 24 h. The effect of autophagy inhibition on MDA-MB-231 cells during ESE-15-one and ESE-16-exposure was similar to that in HeLa cells. ESE-15-one exposure resulted in a decreased cell viability ( $52.41 \pm 7.91\%$ ) and increase in apoptosis ( $42.79 \pm 4.38\%$ ), a response which was attenuated by the addition of 3MA resulting in  $86.45 \pm 0.64\%$  viable- and  $12.38 \pm 0.45\%$  apoptotic cells, values which were not significantly different from the DMSO negative control. Wortmannin addition resulted in a partial reduction in this response, with  $64.88 \pm 2.96\%$  viable- and  $32.46 \pm 2.36\%$  apoptotic cells. Similarly, ESE-16-exposed cells demonstrated relative resistance to the compound when 3MA was added, significantly increasing the viability ( $73.92 \pm 4.23\%$ ) and decreasing the apoptotic fraction ( $24.03 \pm 2.64\%$ ) when compare to the drug-only-exposed cells ( $53.80 \pm 2.88\%$  viable and  $43.26 \pm 5.81\%$  apoptotic). Wortmannin similarly increased the viability to  $74.88 \pm 0.37\%$  and significantly decreased the number of cells undergoing apoptosis ( $23.13 \pm 2.52\%$ ).

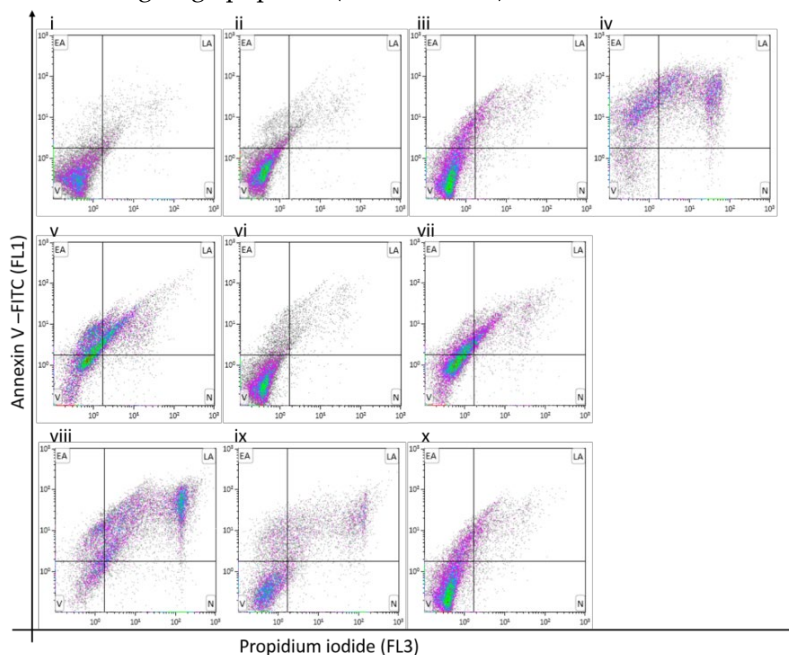

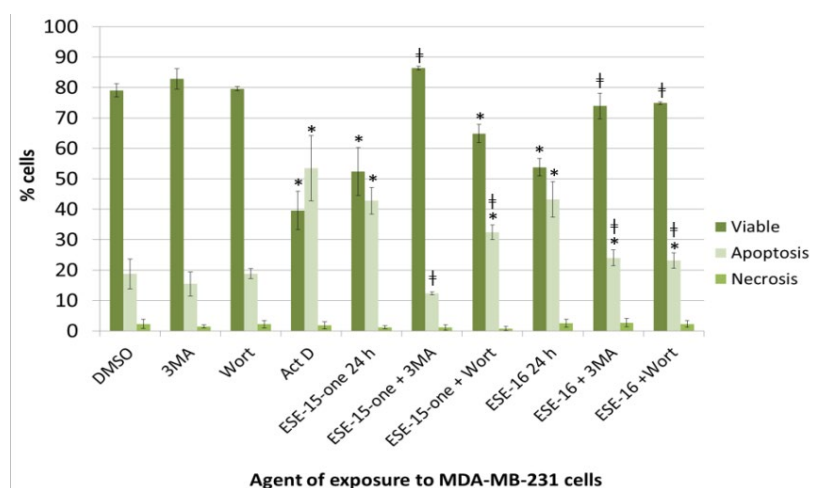

**Figure S6.** Representative Annexin V scatter plots and bar chart of MDA-MB-231 cells exposed to the compounds in the presence or absence of autophagy inhibition. Cells exposed to DMSO (i), 3MA (ii) and wortmannin (iii) showed no effect on cell viability. Actinomycin D (iv) was the positive apoptosis control. ESE-15-one exposure for 24 h (v) showed decreased cell viability with a concomitant increase in apoptotic cells. This response was reduced in the presence of autophagy inhibition with 3MA (vi) and wortmannin (vii). ESE-16-exposure (viii) demonstrated a similar response, but less so in the presence of 3MA (ix) and wortmannin (x). (V = viable cells; EA = early apoptosis; LA = late apoptosis; N = necrosis). SD indicated by error bars; \* $p < 0.05$  when compared to the DMSO vehicle control; # $p < 0.05$  when autophagy-inhibited samples compared to the relevant drug-exposed samples.

**Table S4.** LC3B quantification in drug-exposed HeLa and MDA-MB-231 cells with- and without the inhibition of autophagy. Statistical data were generated using Kaluza 1.3 software (Beckman Coulter, Ca, USA) and analysed using the ANOVA-single factor model and a two-tailed Student's *t*-test. The average fold-increase (three biological repeats) which was detected in drug-exposed cells either alone, or in the presence of 3MA or wortmannin, is shown. The standard deviation (Std dev) and the *p* values were calculated to determine statistical significance when compared to the DMSO vehicle control (\*) or when the autophagy-inhibited samples were compared to the relevant drug-exposed samples (#).

| Agent of exposure          | DMSO | 3MA      | Wort     | Tam      | Tam + 3MA | Tam + Wort | ESE-15-one 24 h | ESE-15-one + 3MA | ESE-15-one + Wort | ESE-16 24 h | ESE-16 + 3MA | ESE-16 + Wort |
|----------------------------|------|----------|----------|----------|-----------|------------|-----------------|------------------|-------------------|-------------|--------------|---------------|
| <b>HeLa cells</b>          |      |          |          |          |           |            |                 |                  |                   |             |              |               |
| Average                    | 1    | 1.00     | 0.93     | 1.89     | 0.99      | 0.89       | 1.59            | 1.17             | 1.30              | 1.63        | 1.26         | 1.34          |
| Std dev                    | 0    | 0.09     | 0.01     | 0.22     | 0.20      | 0.09       | 0.29            | 0.14             | 0.07              | 0.15        | 0.09         | 0.15          |
| <i>P</i> value (*) cf DMSO |      | 9.33E-01 | 1.22E-06 | 1.13E-03 | 9.63E-01  | 1.04E-01   | 1.85E-02        | 1.08E-01         | 4.74E-03          | 7.22E-04    | 4.00E-03     | 1.74E-02      |
| <i>P</i> value (#) cf drug |      |          |          |          | 1.03E-03  | 4.44E-03   |                 | 3.98E-02         | 2.61E-01          |             | 4.47E-03     | 4.51E-02      |
| <b>MDA-MB-231 cells</b>    |      |          |          |          |           |            |                 |                  |                   |             |              |               |
| Average                    | 1    | 1.14     | 1.07     | 2.90     | 1.68      | 1.97       | 2.61            | 1.14             | 1.60              | 2.16        | 1.23         | 0.97          |
| Std dev                    | 0    | 0.19     | 0.04     | 0.54     | 0.38      | 0.46       | 0.46            | 0.13             | 0.30              | 0.43        | 0.21         | 0.23          |
| <i>P</i> value (*) cf DMSO |      | 2.92E-01 | 5.66E-02 | 3.80E-03 | 3.62E-02  | 2.84E-02   | 3.86E-03        | 1.37E-01         | 2.73E-02          | 9.62E-03    | 1.32E-01     | 8.56E-01      |
| <i>P</i> value (#) cf drug |      |          |          |          | 3.33E-02  | 1.45E-01   |                 | 2.49E-02         | 3.42E-02          |             | 2.82E-02     | 1.38E-02      |

### S2.5. Reverse phase protein array graphs

Individual results of the RPPA experiments in which ESE-15-one and ESE-16 (0.186  $\mu$ M and 0.5  $\mu$ M respectively) were used to treat HeLa and MDA-MB-231 cells in a time series.





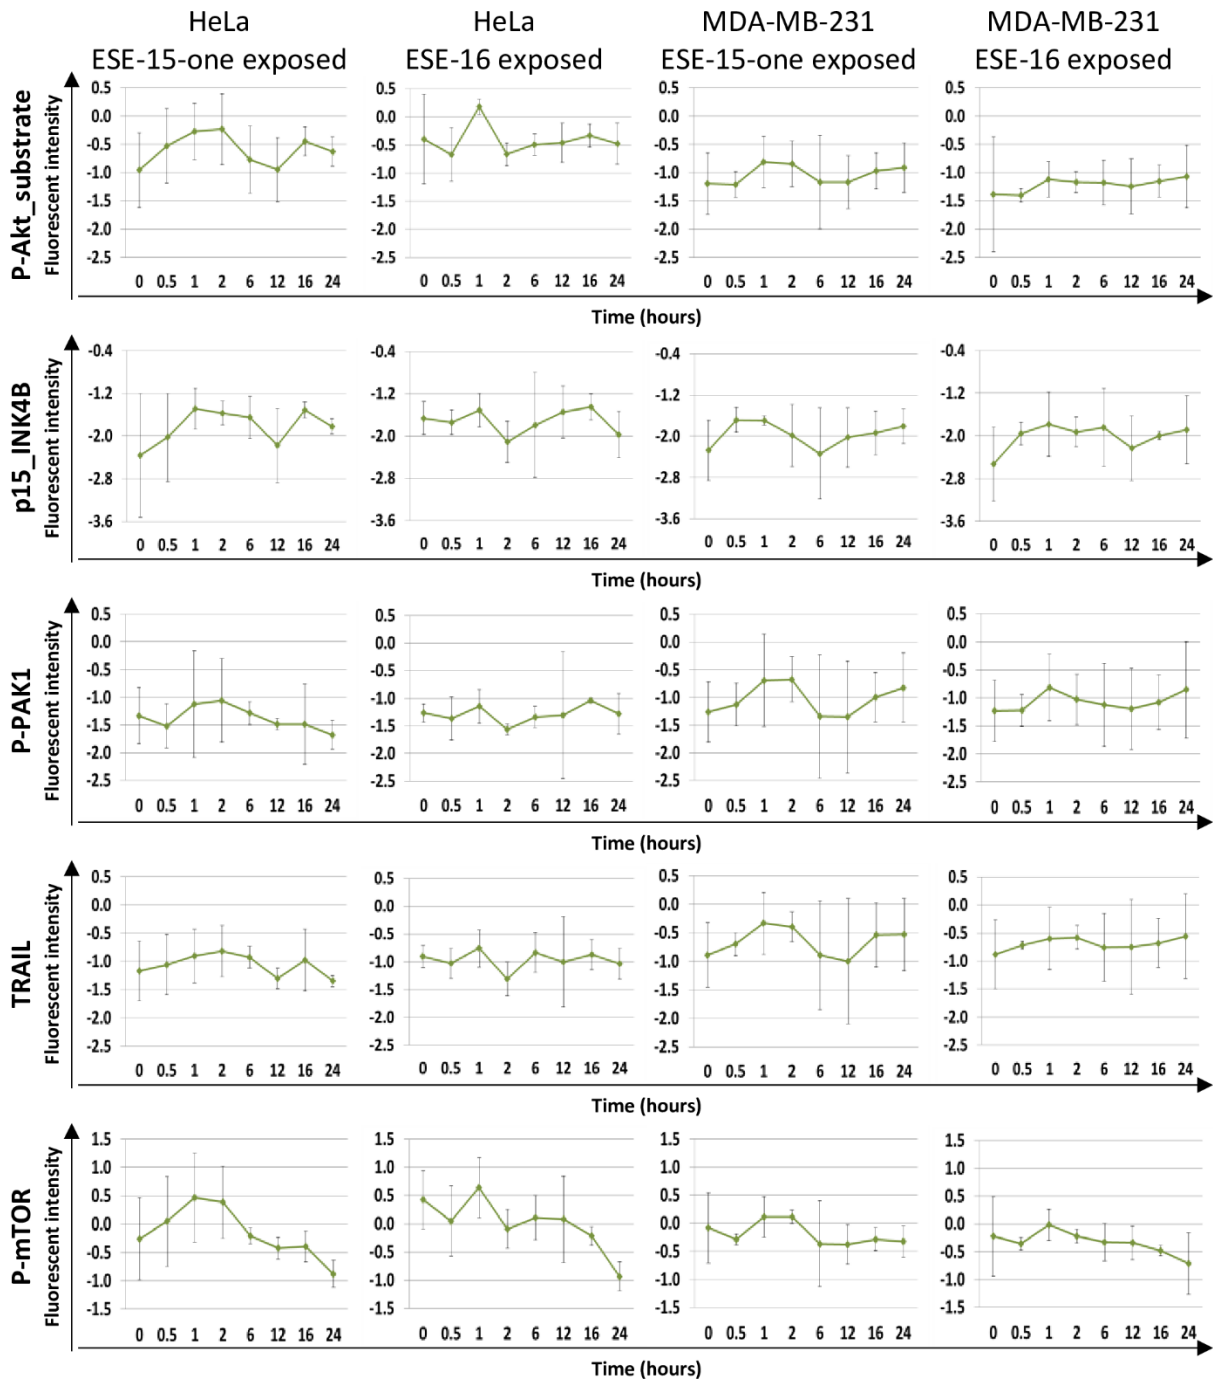

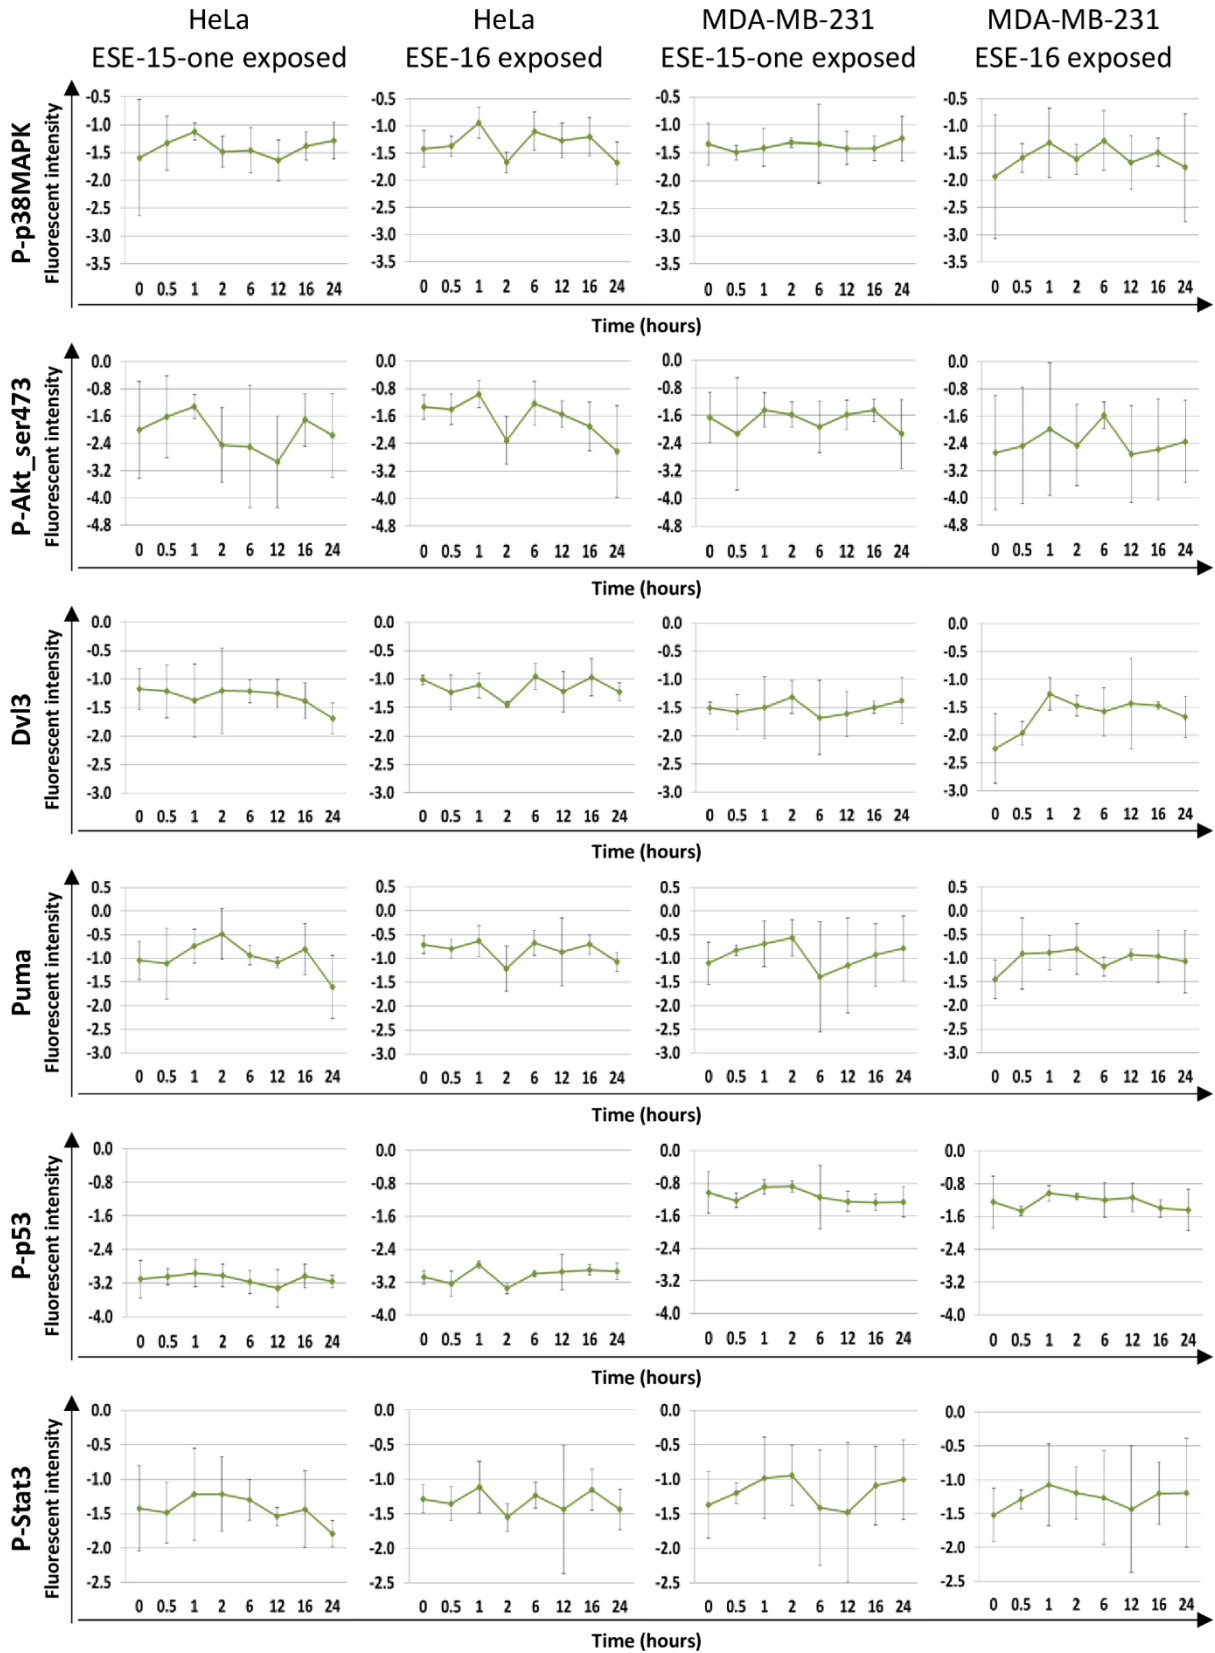

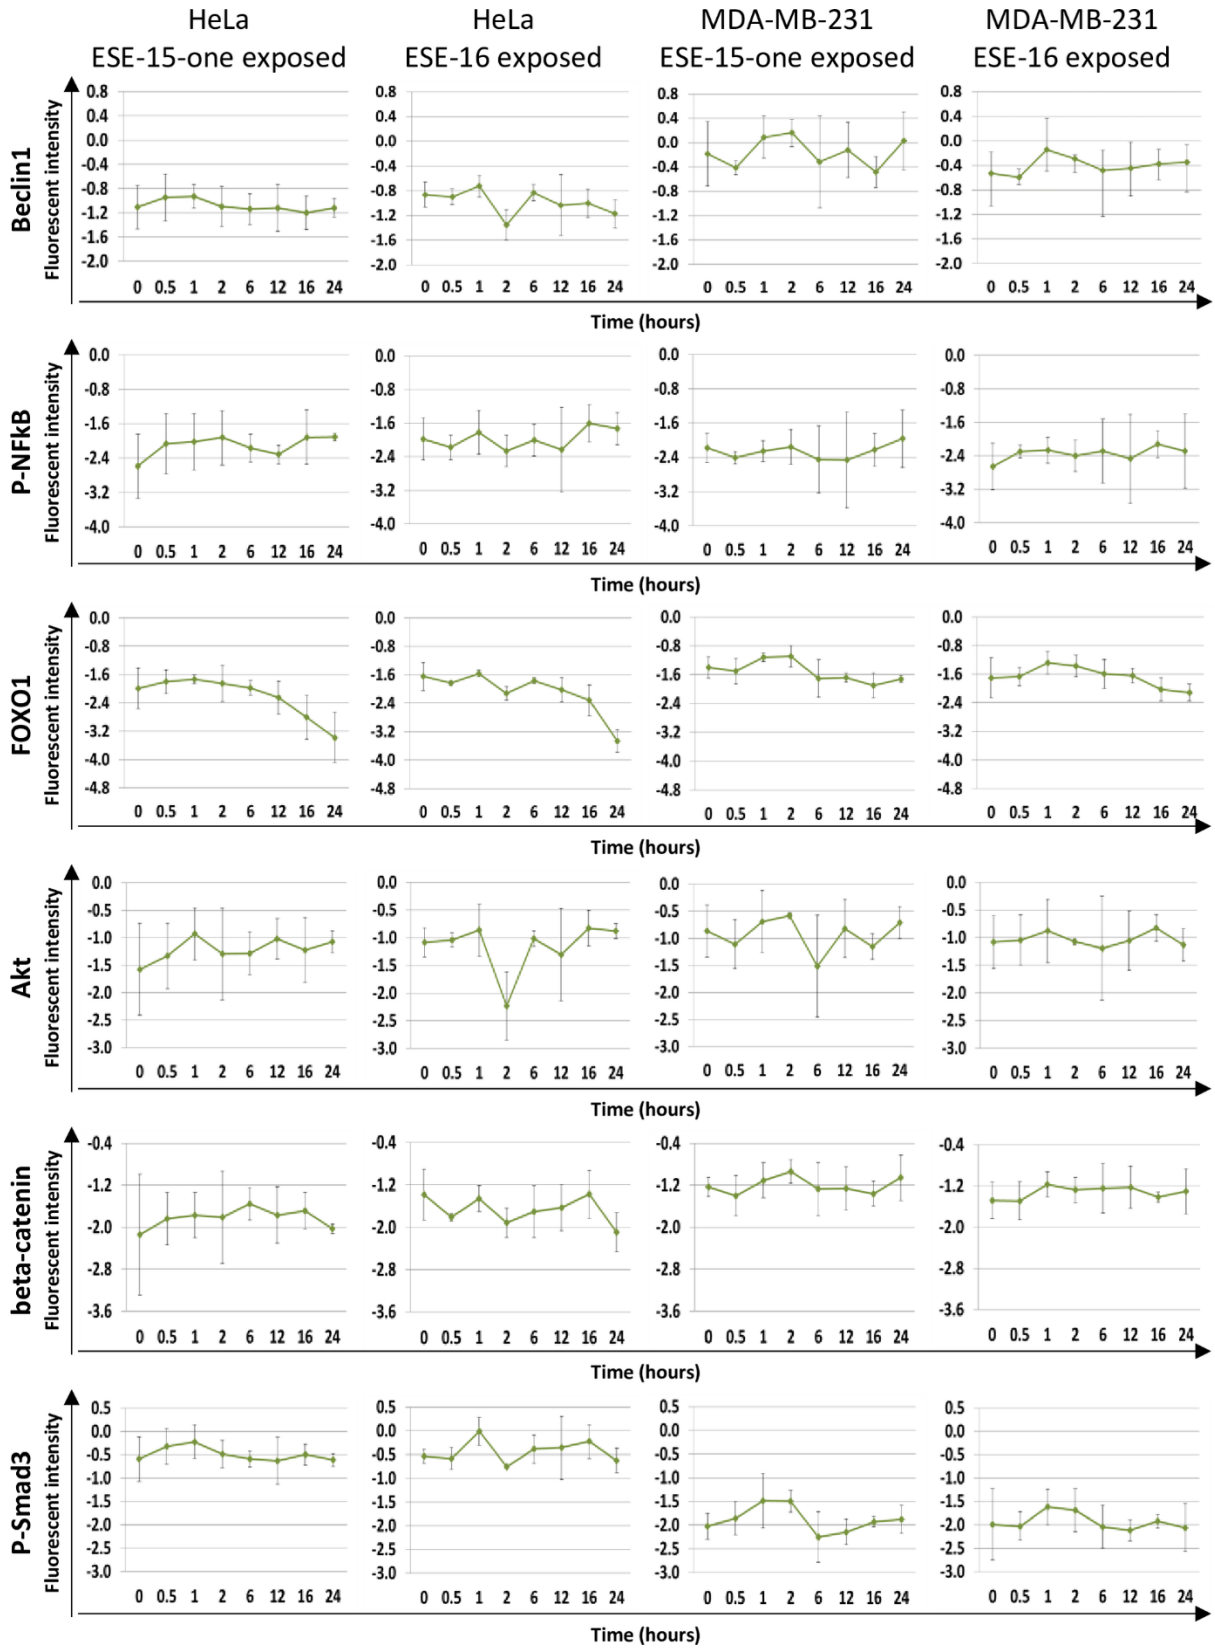

S2.6. Western blots

Tables of statistical analysis provided for the Western blot experiments.

**Table S5.** Src expression (A) and sequential Src phosphorylation (B) in HeLa and MDA-MB-231 cells exposed to the novel compounds.

| A          |             |      |          |          |          |          |          | A          |             |      |       |          |          |          |          |          |
|------------|-------------|------|----------|----------|----------|----------|----------|------------|-------------|------|-------|----------|----------|----------|----------|----------|
| HeLa       | Fold-change | DMSO | 0.5 h    | 1 h      | 2 h      | 6 h      | 24 h     | MDA-MD-231 | Fold-change | DMSO | 0.5 h | 1 h      | 2 h      | 6 h      | 24 h     |          |
| ESE-15-one | Mean        | 1    | 0.82     | 0.81     | 1.01     | 0.86     | 0.62     | ESE-15-one | Mean        | 1    | 0.99  | 1.13     | 0.91     | 0.85     | 0.58     |          |
|            | SEM         |      | 0.141    | 0.137    | 0.038    | 0.117    | 0.262    |            | SEM         |      |       | 0.057    | 0.073    | 0.074    | 0.176    | 0.089    |
|            | P value     |      | 2.08E-01 | 3.28E-01 | 3.59E-01 | 5.73E-01 | 1.27E-02 |            | P value     |      |       | 9.01E-01 | 8.63E-02 | 1.95E-01 | 3.53E-01 | 2.44E-03 |
| ESE-16     | Mean        | 1    | 0.80     | 0.67     | 0.65     | 0.72     | 0.33     | ESE-16     | Mean        | 1    | 0.91  | 1.13     | 0.82     | 0.82     | 0.45     |          |
|            | SEM         |      | 0.189    | 0.058    | 0.080    | 0.169    | 0.119    |            | SEM         |      |       | 0.042    | 0.193    | 0.086    | 0.117    | 0.025    |
|            | P value     |      | 2.00E-01 | 3.57E-04 | 1.04E-03 | 6.52E-02 | 3.74E-04 |            | P value     |      |       | 6.93E-02 | 4.61E-01 | 7.70E-02 | 1.26E-01 | 6.08E-07 |

  

| B          |             |      |          |          |          |          |          | B          |             |      |       |          |          |          |          |          |
|------------|-------------|------|----------|----------|----------|----------|----------|------------|-------------|------|-------|----------|----------|----------|----------|----------|
| HeLa       | Fold change | DMSO | 0.5 h    | 1 h      | 2 h      | 6 h      | 24 h     | MDA-MD-231 | Fold change | DMSO | 0.5 h | 1 h      | 2 h      | 6 h      | 24 h     |          |
| ESE-15-one | Mean        | 1    | 0.91     | 1.14     | 0.89     | 0.93     | 0.40     | ESE-15-one | Mean        | 1    | 2.61  | 2.54     | 1.38     | 2.17     | 1.85     |          |
|            | SEM         |      | 0.172    | 0.102    | 0.064    | 0.056    | 0.188    |            | SEM         |      |       | 0.593    | 0.198    | 0.179    | 0.289    | 0.574    |
|            | P value     |      | 6.46E-01 | 2.40E-01 | 1.74E-01 | 2.99E-01 | 3.39E-02 |            | P value     |      |       | 2.31E-02 | 2.48E-04 | 7.59E-02 | 6.80E-03 | 1.88E-01 |
| ESE-16     | Mean        | 1    | 0.98     | 1.17     | 0.97     | 0.91     | 0.44     | ESE-16     | Mean        | 1    | 1.14  | 2.98     | 1.44     | 0.77     | 0.58     |          |
|            | SEM         |      | 0.164    | 0.084    | 0.216    | 0.208    | 0.113    |            | SEM         |      |       | 0.133    | 0.945    | 0.418    | 0.247    | 0.211    |
|            | P value     |      | 9.22E-01 | 1.15E-01 | 8.84E-01 | 6.96E-01 | 7.50E-03 |            | P value     |      |       | 1.49E-01 | 2.67E-02 | 2.62E-01 | 2.09E-01 | 9.60E-02 |

**Table S6.** Erk expression (A) and sequential Erk phosphorylation (B) in HeLa and MDA-MB-231 cells exposed to the novel compounds.

| A          |             |      |          |          |          |          |          | A          |             |      |       |          |          |          |          |          |
|------------|-------------|------|----------|----------|----------|----------|----------|------------|-------------|------|-------|----------|----------|----------|----------|----------|
| HeLa       | Fold-change | DMSO | 0.5 h    | 1 h      | 2 h      | 6 h      | 24 h     | MDA-MD-231 | Fold-change | DMSO | 0.5 h | 1 h      | 2 h      | 6 h      | 24 h     |          |
| ESE-15-one | Mean        | 1    | 0.96     | 1.02     | 1.00     | 0.95     | 0.82     | ESE-15-one | Mean        | 1    | 0.98  | 1.12     | 0.95     | 1.01     | 0.92     |          |
|            | SEM         |      | 0.078    | 0.136    | 0.119    | 0.022    | 0.024    |            | SEM         |      |       | 0.046    | 0.049    | 0.134    | 0.145    | 0.166    |
|            | P value     |      | 6.29E-01 | 8.42E-01 | 9.83E-01 | 8.03E-02 | 3.07E-04 |            | P value     |      |       | 6.44E-01 | 2.75E-02 | 6.21E-01 | 9.21E-01 | 5.40E-01 |
| ESE-16     | Mean        | 1    | 0.95     | 0.99     | 1.00     | 0.97     | 0.81     | ESE-16     | Mean        | 1    | 0.96  | 0.96     | 1.12     | 1.14     | 0.80     |          |
|            | SEM         |      | 0.093    | 0.041    | 0.080    | 0.193    | 0.040    |            | SEM         |      |       | 0.064    | 0.112    | 0.062    | 0.106    | 0.179    |
|            | P value     |      | 5.86E-01 | 8.65E-01 | 9.62E-01 | 8.73E-01 | 2.66E-03 |            | P value     |      |       | 5.79E-01 | 6.55E-01 | 3.84E-02 | 1.29E-01 | 2.47E-01 |

  

| B          |             |      |          |          |          |          |          | B          |             |      |       |          |          |          |          |          |
|------------|-------------|------|----------|----------|----------|----------|----------|------------|-------------|------|-------|----------|----------|----------|----------|----------|
| HeLa       | Fold-change | DMSO | 0.5 h    | 1 h      | 2 h      | 6 h      | 24 h     | MDA-MD-231 | Fold-change | DMSO | 0.5 h | 1 h      | 2 h      | 6 h      | 24 h     |          |
| ESE-15-one | Mean        | 1    | 1.24     | 1.61     | 1.11     | 1.25     | 0.46     | ESE-15-one | Mean        | 1    | 0.94  | 2.07     | 3.24     | 1.20     | 1.16     |          |
|            | SEM         |      | 0.112    | 0.098    | 0.031    | 0.128    | 0.169    |            | SEM         |      |       | 0.173    | 0.357    | 0.050    | 0.119    | 0.040    |
|            | P value     |      | 7.51E-02 | 8.31E-04 | 1.47E-02 | 3.41E-02 | 1.86E-02 |            | P value     |      |       | 6.90E-01 | 4.67E-03 | 9.80E-11 | 3.95E-02 | 5.78E-04 |
| ESE-16     | Mean        | 1    | 1.55     | 1.63     | 1.66     | 1.29     | 0.38     | ESE-16     | Mean        | 1    | 1.24  | 2.03     | 1.35     | 0.83     | 0.32     |          |
|            | SEM         |      | 0.199    | 0.125    | 0.274    | 0.172    | 0.131    |            | SEM         |      |       | 0.117    | 0.492    | 0.204    | 0.180    | 0.052    |
|            | P value     |      | 2.20E-02 | 2.32E-03 | 3.48E-02 | 9.70E-02 | 3.23E-03 |            | P value     |      |       | 4.63E-02 | 1.54E-02 | 3.26E-02 | 2.11E-01 | 5.76E-08 |

**Table S7.** Sequential JNK phosphorylation in HeLa and MDA-MB-231 cells exposed to the novel compounds.

| HeLa       | Fold-change |      |          |          |          |          |          | MDA-MD-231 | Fold-change |      |          |          |          |          |          |
|------------|-------------|------|----------|----------|----------|----------|----------|------------|-------------|------|----------|----------|----------|----------|----------|
|            |             | DMSO | 0.5 h    | 1 h      | 2 h      | 6 h      | 24 h     |            |             | DMSO | 0.5 h    | 1 h      | 2 h      | 6 h      | 24 h     |
| ESE-15-one | Mean        | 1    | 0.18     | 0.58     | 0.69     | 0.95     | 24.54    | ESE-15-one | Mean        | 1    | 0.63     | 0.88     | 0.53     | 7.36     | 8.93     |
|            | SEM         |      | 0.146    | 0.289    | 0.382    | 0.474    | 8.975    |            | SEM         |      | 0.108    | 0.063    | 0.227    | 0.935    | 1.633    |
|            | P value     |      | 2.21E-04 | 7.44E-03 | 4.67E-01 | 9.18E-01 | 3.89E-02 |            | P value     |      | 1.93E-02 | 1.38E-01 | 6.90E-02 | 2.78E-03 | 7.35E-03 |
| ESE-16     | Mean        | 1    | 0.51     | 0.88     | 0.99     | 4.74     | 26.33    | ESE-16     | Mean        | 1    | 0.96     | 1.15     | 0.92     | 3.63     | 9.04     |
|            | SEM         |      | 0.187    | 0.019    | 0.521    | 0.234    | 5.404    |            | SEM         |      | 0.056    | 0.245    | 0.200    | 1.152    | 0.088    |
|            | P value     |      | 3.92E-02 | 3.70E-03 | 9.80E-01 | 2.21E-04 | 4.12E-02 |            | P value     |      | 5.04E-01 | 4.66E-01 | 6.47E-01 | 5.47E-02 | 3.92E-06 |

**Table S8.** Expression of c-Myc in HeLa and MDA-MB-231 cells exposed to the novel compounds.

| HeLa       | Fold-change |      |          |          |          |          |          | MDA-MD-231 | Fold-change |      |          |          |          |          |          |
|------------|-------------|------|----------|----------|----------|----------|----------|------------|-------------|------|----------|----------|----------|----------|----------|
|            |             | DMSO | 0.5 h    | 1 h      | 2 h      | 6 h      | 24 h     |            |             | DMSO | 0.5 h    | 1 h      | 2 h      | 6 h      | 24 h     |
| ESE-15-one | Mean        | 1    | 0.81     | 0.83     | 1.17     | 1.20     | 0.77     | ESE-15-one | Mean        | 1    | 0.96     | 1.17     | 0.89     | 0.69     | 0.66     |
|            | SEM         |      | 0.214    | 0.174    | 0.152    | 0.260    | 0.303    |            | SEM         |      | 0.078    | 0.167    | 0.187    | 0.067    | 0.037    |
|            | P value     |      | 3.28E-01 | 1.79E-01 | 1.40E-01 | 2.80E-01 | 4.79E-01 |            | P value     |      | 4.20E-01 | 2.69E-01 | 5.21E-01 | 2.69E-03 | 1.02E-04 |
| ESE-16     | Mean        | 1    | 1.04     | 1.07     | 0.97     | 0.70     | 1.01     | ESE-16     | Mean        | 1    | 1.00     | 0.99     | 0.98     | 0.98     | 0.52     |
|            | SEM         |      | 0.262    | 0.215    | 0.257    | 0.348    | 0.324    |            | SEM         |      | 0.118    | 0.142    | 0.103    | 0.142    | 0.087    |
|            | P value     |      | 8.91E-01 | 7.02E-01 | 9.14E-01 | 3.37E-01 | 9.80E-01 |            | P value     |      | 9.82E-01 | 9.64E-01 | 8.53E-01 | 8.62E-01 | 1.20E-03 |

**Table S9.** Sequential Akt phosphorylation in HeLa and MDA-MB-231 cells exposed to the novel compounds.

| HeLa       | Fold-change |      |          |          |          |          |          | MDA-MD-231 | Fold-change |      |          |          |          |          |          |
|------------|-------------|------|----------|----------|----------|----------|----------|------------|-------------|------|----------|----------|----------|----------|----------|
|            |             | DMSO | 0.5 h    | 1 h      | 2 h      | 6 h      | 24 h     |            |             | DMSO | 0.5 h    | 1 h      | 2 h      | 6 h      | 24 h     |
| ESE-15-one | Mean        | 1    | 0.82     | 0.81     | 1.01     | 0.86     | 0.62     | ESE-15-one | Mean        | 1    | 1.16     | 0.94     | 0.47     | 0.32     | 0.40     |
|            | SEM         |      | 0.141    | 0.137    | 0.038    | 0.117    | 0.262    |            | SEM         |      | 0.017    | 0.121    | 0.263    | 0.114    | 0.198    |
|            | P value     |      | 1.24E-01 | 1.61E-01 | 8.63E-01 | 1.45E-01 | 4.23E-02 |            | P value     |      | 1.04E-03 | 6.48E-01 | 1.13E-01 | 3.95E-03 | 3.96E-02 |
| ESE-16     | Mean        | 1    | 0.80     | 0.67     | 0.65     | 0.72     | 0.33     | ESE-16     | Mean        | 1    | 1.49     | 0.81     | 0.44     | 0.71     | 0.76     |
|            | SEM         |      | 0.189    | 0.058    | 0.080    | 0.169    | 0.119    |            | SEM         |      | 0.029    | 0.042    | 0.181    | 0.177    | 0.069    |
|            | P value     |      | 2.00E-01 | 3.57E-04 | 1.04E-03 | 6.52E-02 | 3.74E-04 |            | P value     |      | 1.97E-04 | 9.16E-03 | 3.61E-02 | 1.15E-01 | 1.80E-02 |

**Table S10.** Sequential mTOR phosphorylation in HeLa and MDA-MB-231 cells exposed to the novel compounds.

| HeLa       | Fold-change |      |          |          |          |          |          | MDA-MD-231 | Fold-change |      |          |          |          |          |          |
|------------|-------------|------|----------|----------|----------|----------|----------|------------|-------------|------|----------|----------|----------|----------|----------|
|            |             | DMSO | 0.5 h    | 1 h      | 2 h      | 6 h      | 24 h     |            |             | DMSO | 0.5 h    | 1 h      | 2 h      | 6 h      | 24 h     |
| ESE-15-one | Mean        | 1    | 1.03     | 1.25     | 1.25     | 1.05     | 0.42     | ESE-15-one | Mean        | 1    | 1.76     | 2.40     | 1.25     | 0.90     | 0.54     |
|            | SEM         |      | 0.220    | 0.177    | 0.098    | 0.138    | 0.186    |            | SEM         |      | 0.038    | 0.142    | 0.134    | 0.099    | 0.086    |
|            | P value     |      | 8.72E-01 | 1.47E-01 | 2.95E-02 | 7.05E-01 | 2.11E-02 |            | P value     |      | 8.45E-08 | 1.00E-05 | 4.32E-02 | 3.46E-01 | 3.40E-04 |
| ESE-16     | Mean        | 1    | 1.08     | 1.56     | 0.91     | 0.96     | 0.50     | ESE-16     | Mean        | 1    | 1.32     | 1.43     | 1.52     | 0.87     | 0.56     |
|            | SEM         |      | 0.026    | 0.222    | 0.083    | 0.143    | 0.166    |            | SEM         |      | 0.081    | 0.064    | 0.235    | 0.259    | 0.168    |
|            | P value     |      | 1.68E-02 | 4.47E-02 | 3.94E-01 | 7.77E-01 | 2.44E-02 |            | P value     |      | 2.90E-03 | 9.49E-05 | 2.35E-02 | 5.98E-01 | 1.17E-02 |



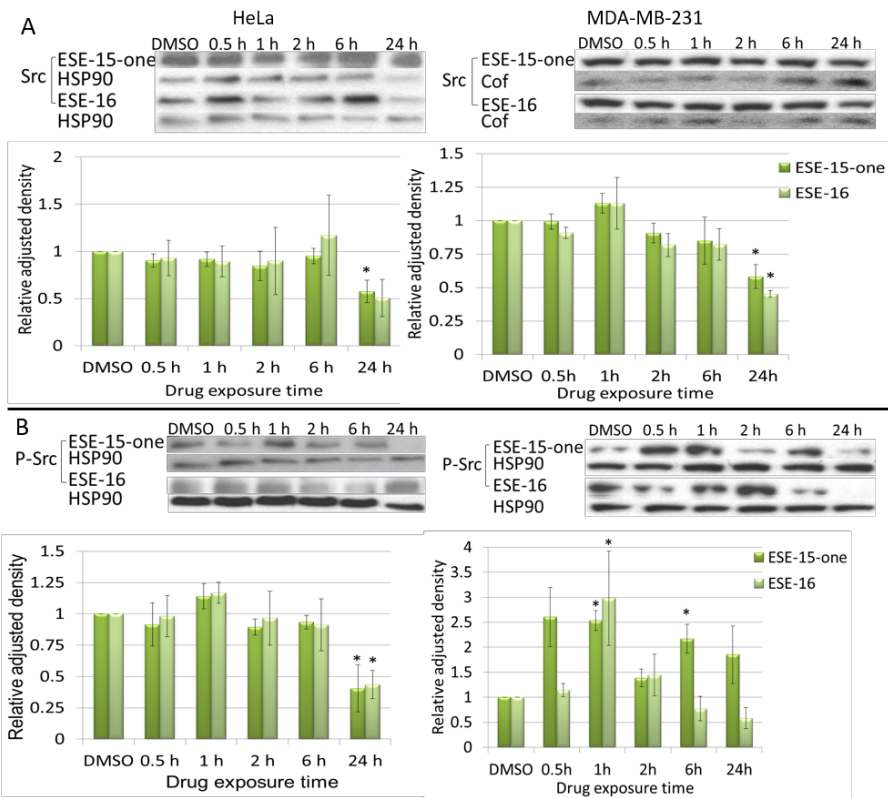

**Figure S7.** Src expression (A) and sequential Src phosphorylation (B) in HeLa and MDA-MB-231 cells exposed to the novel compounds. Bars represent a mean fold-increase of at least 3 repeats, the error bar show SEM, and  $*p < 0.05$ .

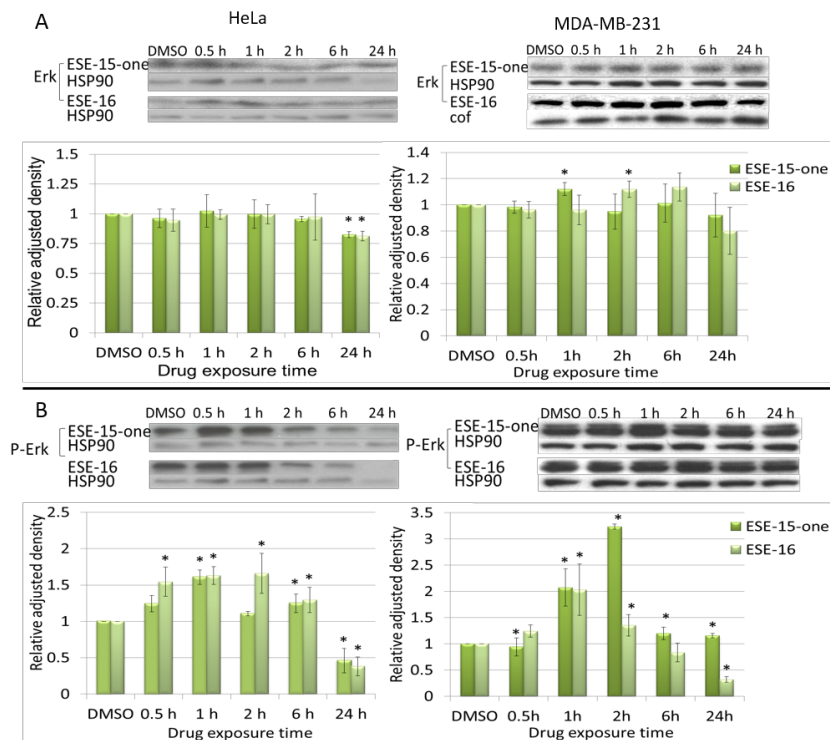

**Figure S8.** Erk expression (A) and sequential Erk phosphorylation (B) in HeLa and MDA-MB-231 cells exposed to the novel compounds. Bars represent a mean fold-increase of at least 3 repeats, the error bar show SEM, and  $*p < 0.05$ .

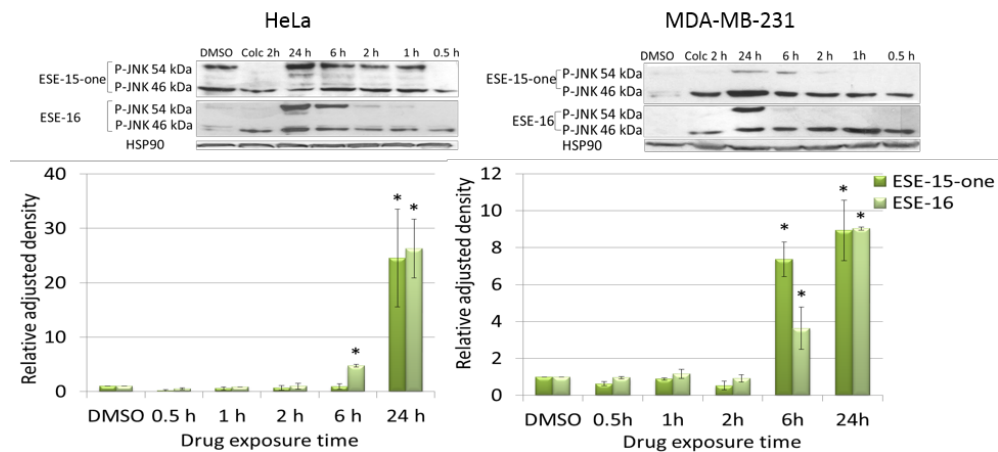

**Figure S9.** Sequential JNK phosphorylation in HeLa and MDA-MB-231 cells exposed to the Bars represent a mean fold-increase of at least 3 repeats of the 54 kDa isoform, the error bar show SEM, and  $*p < 0.05$ .

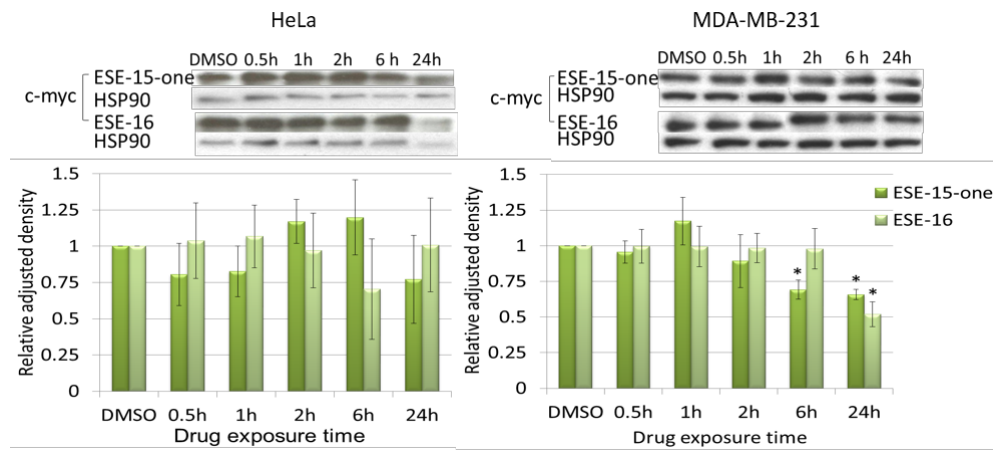

**Figure S10.** Expression of c-Myc in HeLa and MDA-MB-231 cells exposed to the 2-ME analogues. Bars represent a mean fold-increase of at least 3 repeats, the error bar show SEM, and  $*p < 0.05$ .

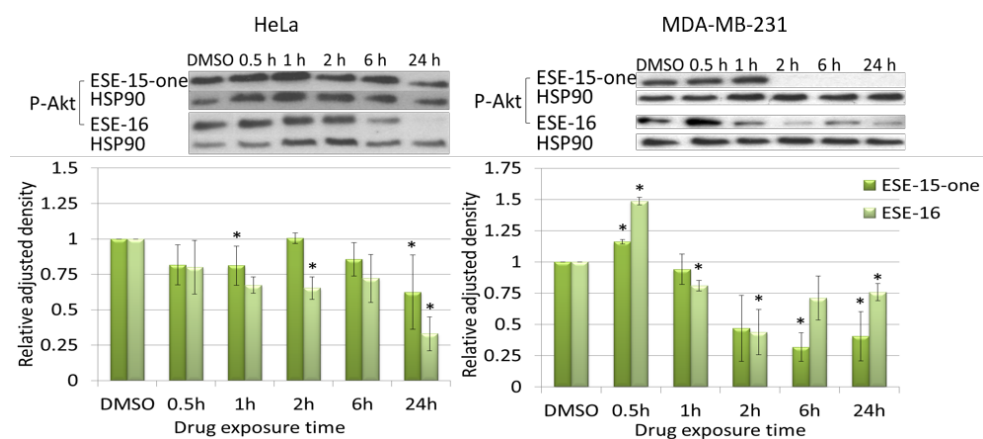

**Figure S11.** Sequential Akt phosphorylation in HeLa and MDA-MB-231 cells exposed to the 2-ME analogues. Bars represent a mean fold-increase of at least 3 repeats, the error bar show SEM, and  $*p < 0.05$ .

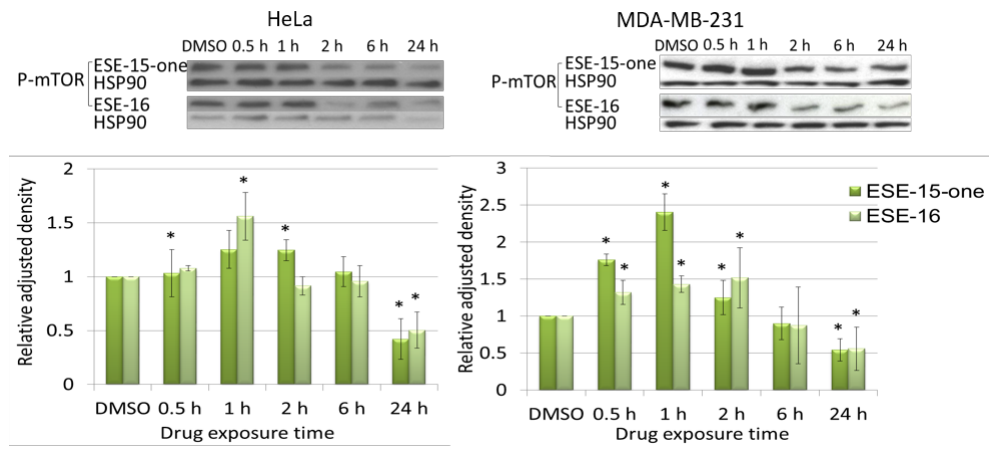

**Figure S12.** Sequential mTOR phosphorylation in HeLa and MDA-MB-231 cells exposed to the 2-ME analogues. Bars represent a mean fold-increase of at least 3 repeats, the error bar show SEM, and  $*p < 0.05$ .
